# Supplementary material for: Consensus for genes to be included on cancer panel tests offered by UK genetics services: guidelines of the UK Cancer Genetics Group
Source: PubMed Central journal article supplement — J Med Genet. 2018 Apr 16;55(6):1–6. doi: 10.1136/jmedgenet-2017-105188 (PMC5992364; doi:10.1136/jmedgenet-2017-105188), 2018-04-16

# Cancer Panels Workshop

8<sup>th</sup> May 2017

Chilworth Manor, Southampton

# Pre-workshop survey results

- 25 responses
- One response = 4%
- Majority agreement = 75%

# Breast cancer panel

\* 2. I think the following genes SHOULD be included on a BREAST CANCER panel:

|       | Strongly disagree        | Disagree                 | Neither agree nor disagree | Agree                    | Strongly agree           |
|-------|--------------------------|--------------------------|----------------------------|--------------------------|--------------------------|
| ATM   | <input type="checkbox"/> | <input type="checkbox"/> | <input type="checkbox"/>   | <input type="checkbox"/> | <input type="checkbox"/> |
| BARD1 | <input type="checkbox"/> | <input type="checkbox"/> | <input type="checkbox"/>   | <input type="checkbox"/> | <input type="checkbox"/> |
| BRCA1 | <input type="checkbox"/> | <input type="checkbox"/> | <input type="checkbox"/>   | <input type="checkbox"/> | <input type="checkbox"/> |
| BRCA2 | <input type="checkbox"/> | <input type="checkbox"/> | <input type="checkbox"/>   | <input type="checkbox"/> | <input type="checkbox"/> |
| BRIP1 | <input type="checkbox"/> | <input type="checkbox"/> | <input type="checkbox"/>   | <input type="checkbox"/> | <input type="checkbox"/> |
| CDH1  | <input type="checkbox"/> | <input type="checkbox"/> | <input type="checkbox"/>   | <input type="checkbox"/> | <input type="checkbox"/> |
| CHEK2 | <input type="checkbox"/> | <input type="checkbox"/> | <input type="checkbox"/>   | <input type="checkbox"/> | <input type="checkbox"/> |
| NBN   | <input type="checkbox"/> | <input type="checkbox"/> | <input type="checkbox"/>   | <input type="checkbox"/> | <input type="checkbox"/> |
| PALB2 | <input type="checkbox"/> | <input type="checkbox"/> | <input type="checkbox"/>   | <input type="checkbox"/> | <input type="checkbox"/> |
| PTEN  | <input type="checkbox"/> | <input type="checkbox"/> | <input type="checkbox"/>   | <input type="checkbox"/> | <input type="checkbox"/> |
| STK11 | <input type="checkbox"/> | <input type="checkbox"/> | <input type="checkbox"/>   | <input type="checkbox"/> | <input type="checkbox"/> |
| TP53  | <input type="checkbox"/> | <input type="checkbox"/> | <input type="checkbox"/>   | <input type="checkbox"/> | <input type="checkbox"/> |

# Breast cancer: majority agreement

**BRCA1**

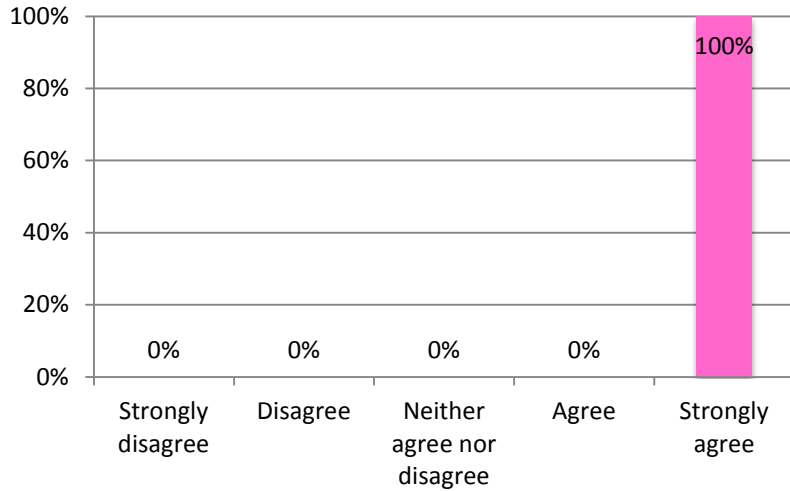

**BRCA2**

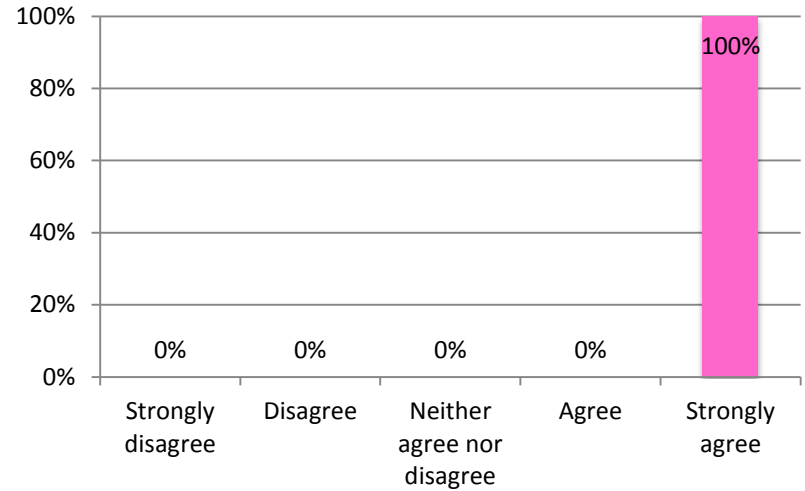

**PALB2**

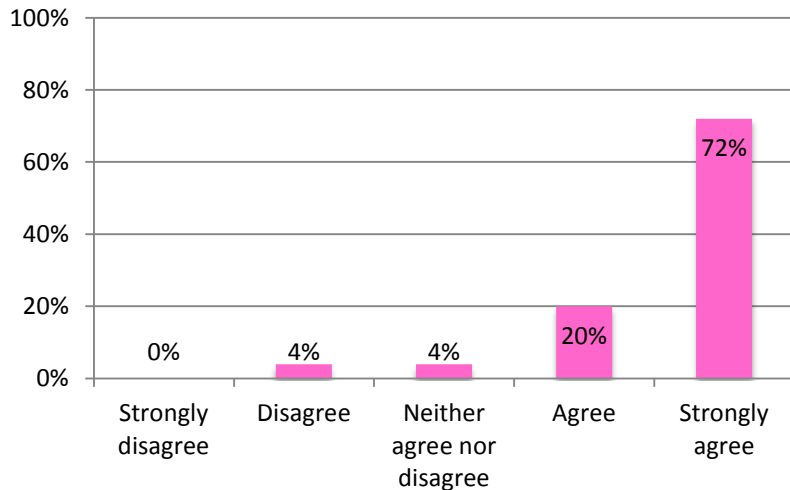

**PTEN**

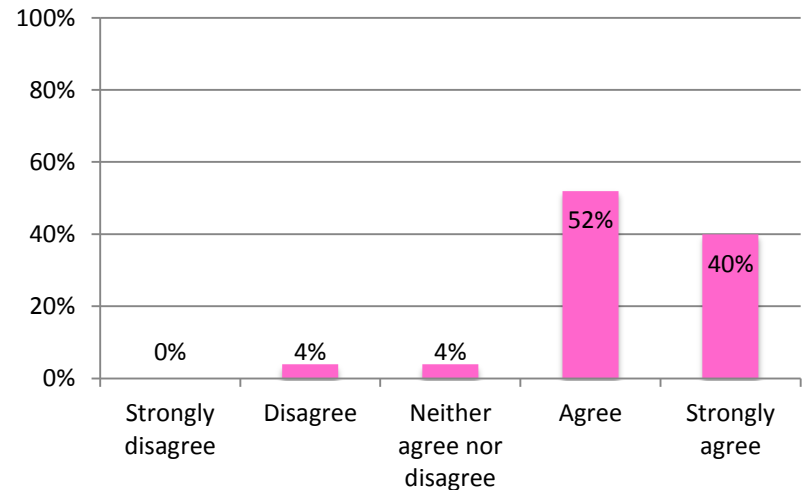

# Breast cancer: majority agreement

**STK11**

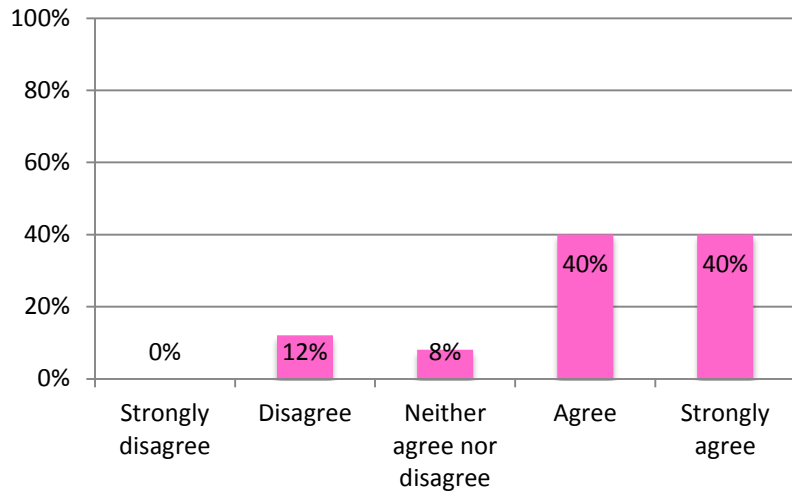

**TP53**

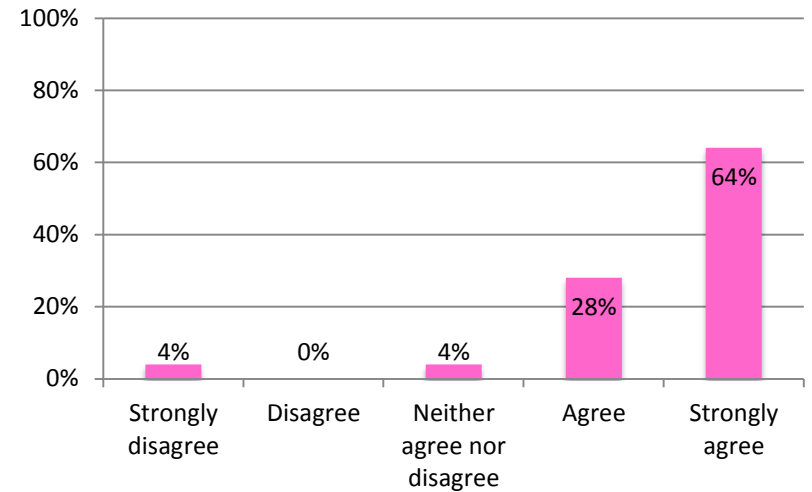

# Breast cancer: TBD

## *ATM*

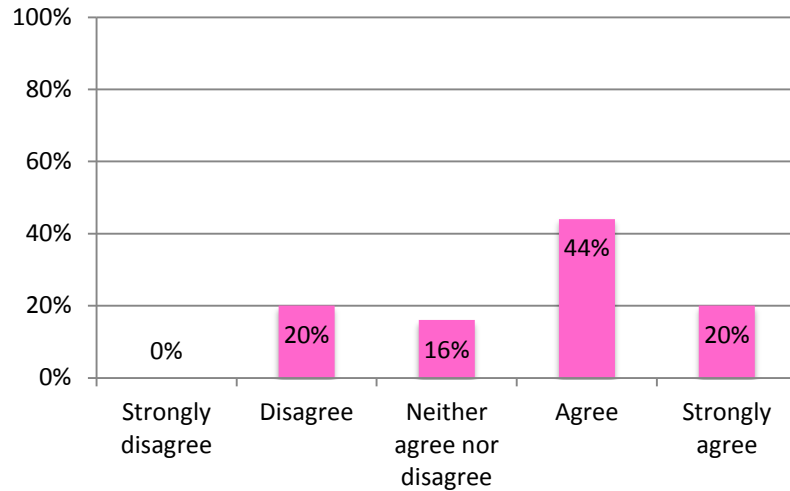

## *BARD1*

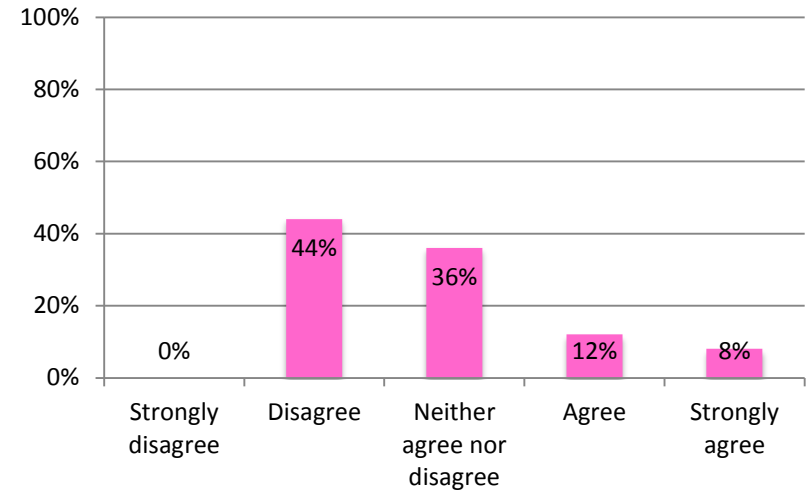

## *BRIP1*

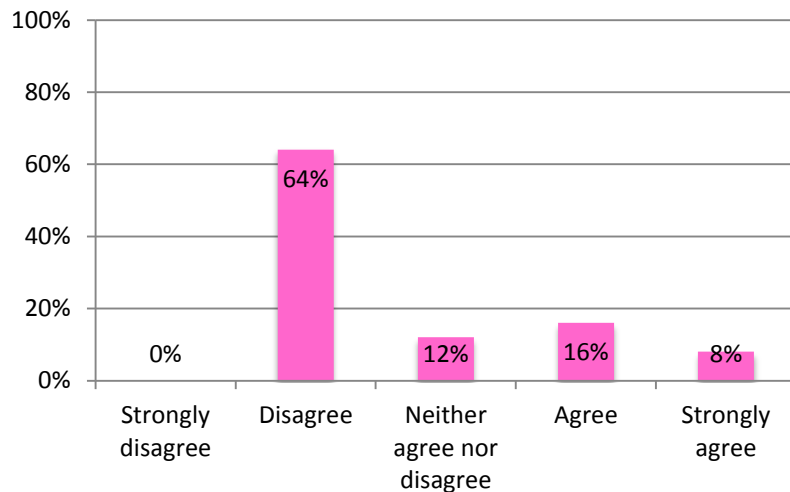

## *CDH1*

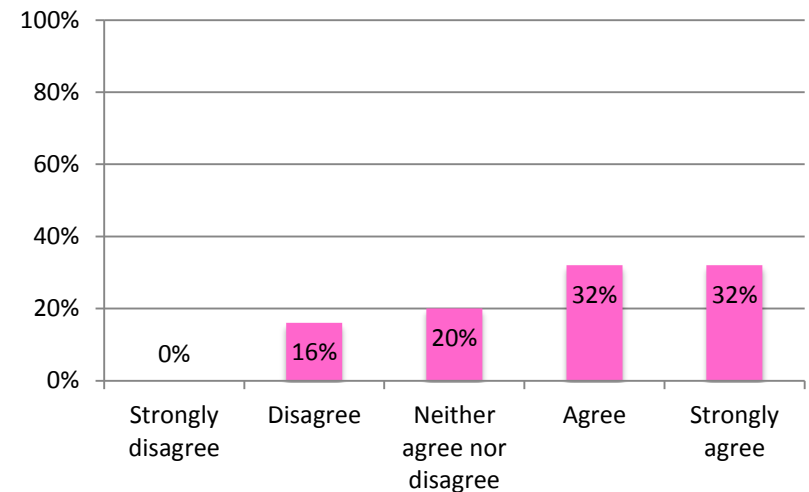

# Breast cancer: TBD

## *CHEK2*

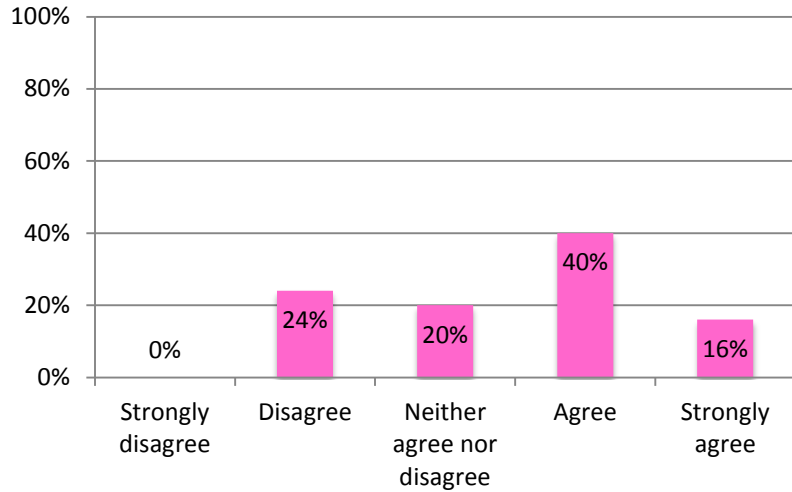

## *NBN*

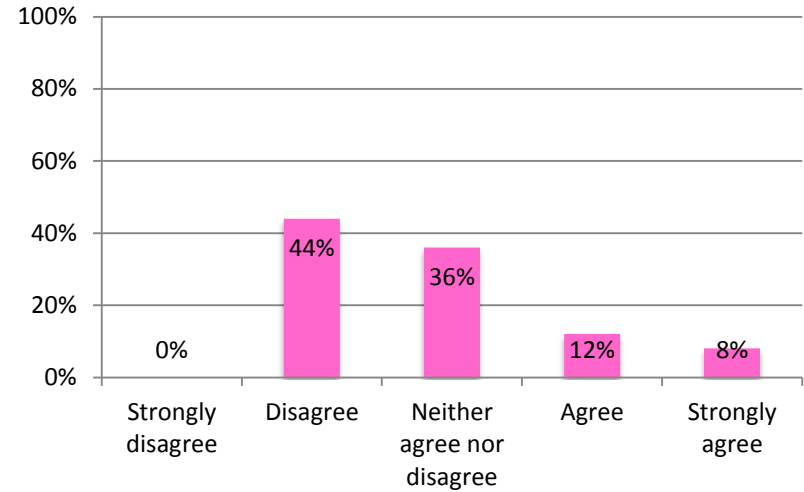

# Ovarian cancer panel

\* 3. I think the following genes SHOULD be included on an OVARIAN CANCER panel:

|        | Strongly disagree        | Disagree                 | Neither agree nor disagree | Agree                    | Strongly agree           |
|--------|--------------------------|--------------------------|----------------------------|--------------------------|--------------------------|
| BRCA1  | <input type="checkbox"/> | <input type="checkbox"/> | <input type="checkbox"/>   | <input type="checkbox"/> | <input type="checkbox"/> |
| BRCA2  | <input type="checkbox"/> | <input type="checkbox"/> | <input type="checkbox"/>   | <input type="checkbox"/> | <input type="checkbox"/> |
| BRIP1  | <input type="checkbox"/> | <input type="checkbox"/> | <input type="checkbox"/>   | <input type="checkbox"/> | <input type="checkbox"/> |
| EPCAM  | <input type="checkbox"/> | <input type="checkbox"/> | <input type="checkbox"/>   | <input type="checkbox"/> | <input type="checkbox"/> |
| MLH1   | <input type="checkbox"/> | <input type="checkbox"/> | <input type="checkbox"/>   | <input type="checkbox"/> | <input type="checkbox"/> |
| MSH2   | <input type="checkbox"/> | <input type="checkbox"/> | <input type="checkbox"/>   | <input type="checkbox"/> | <input type="checkbox"/> |
| MSH6   | <input type="checkbox"/> | <input type="checkbox"/> | <input type="checkbox"/>   | <input type="checkbox"/> | <input type="checkbox"/> |
| PMS2   | <input type="checkbox"/> | <input type="checkbox"/> | <input type="checkbox"/>   | <input type="checkbox"/> | <input type="checkbox"/> |
| RAD51C | <input type="checkbox"/> | <input type="checkbox"/> | <input type="checkbox"/>   | <input type="checkbox"/> | <input type="checkbox"/> |
| RAD51D | <input type="checkbox"/> | <input type="checkbox"/> | <input type="checkbox"/>   | <input type="checkbox"/> | <input type="checkbox"/> |
| STK11  | <input type="checkbox"/> | <input type="checkbox"/> | <input type="checkbox"/>   | <input type="checkbox"/> | <input type="checkbox"/> |
| TP53   | <input type="checkbox"/> | <input type="checkbox"/> | <input type="checkbox"/>   | <input type="checkbox"/> | <input type="checkbox"/> |



# Ovarian cancer: Majority agreement

## *BRCA1*

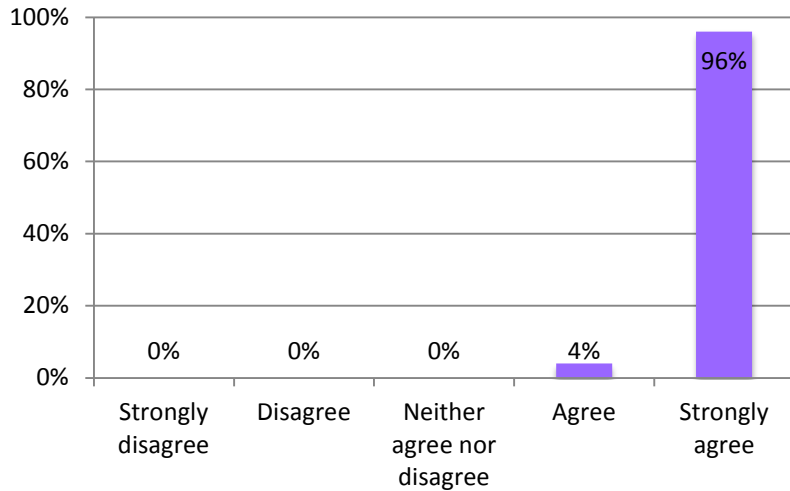

## *BRCA2*

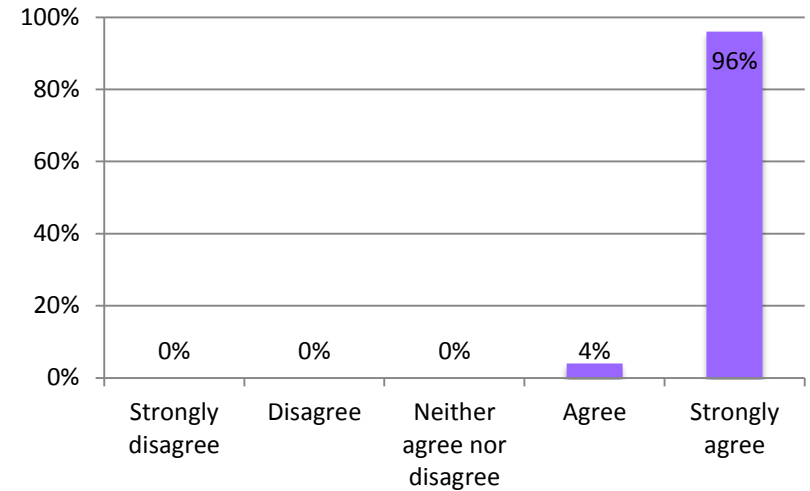

## *MLH1, MSH2 & MSH6*

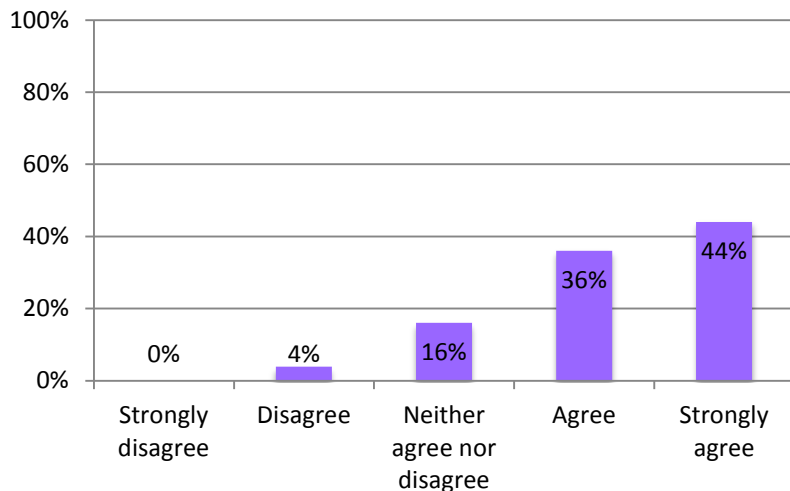

## *PMS2*

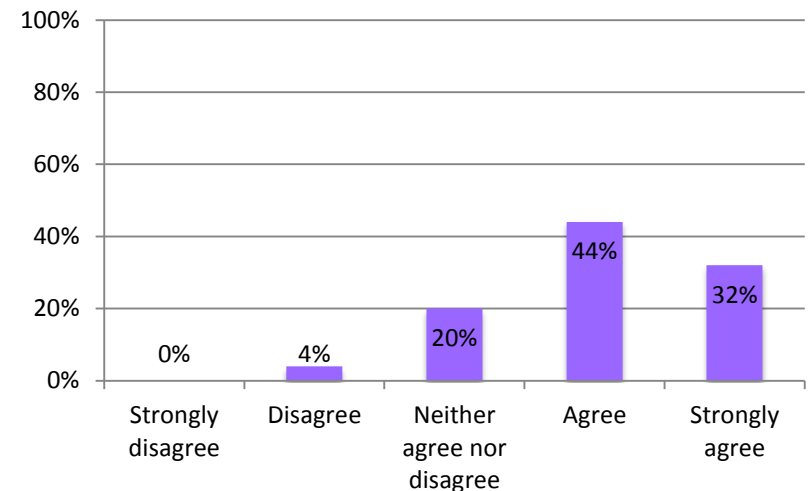

# Ovarian cancer: Majority agreement

***RAD51C***

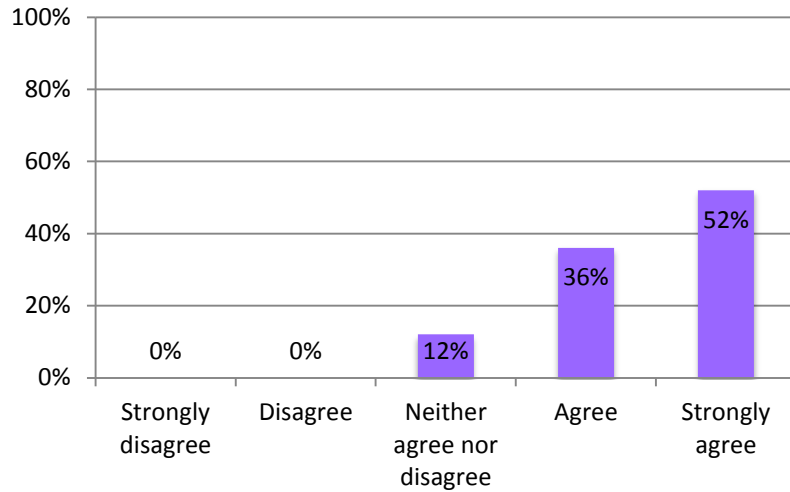

***RAD51D***

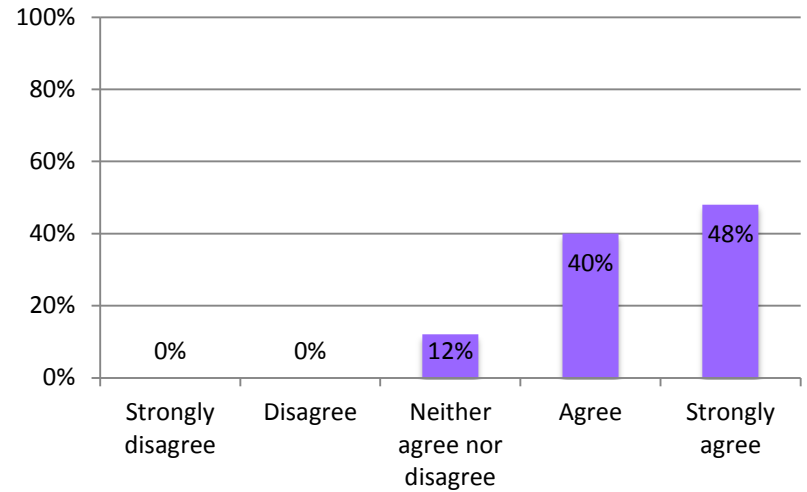

# Ovarian cancer: TBD

## ***BRIP1***

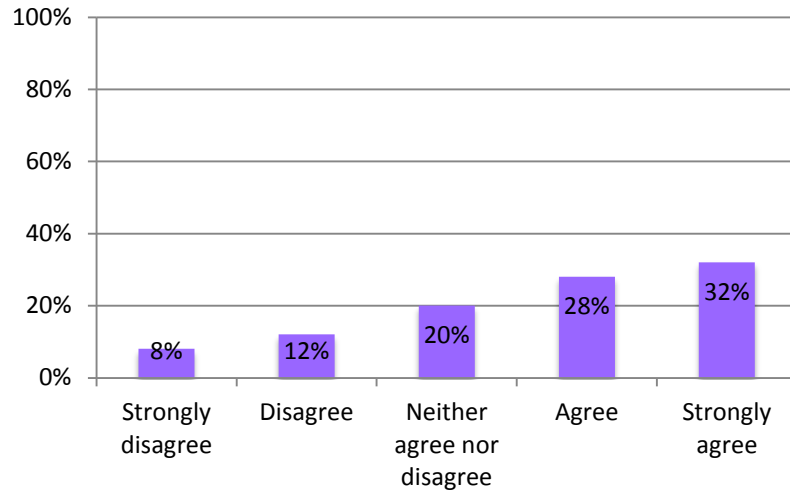

## ***EPCAM (del exons 8-9)***

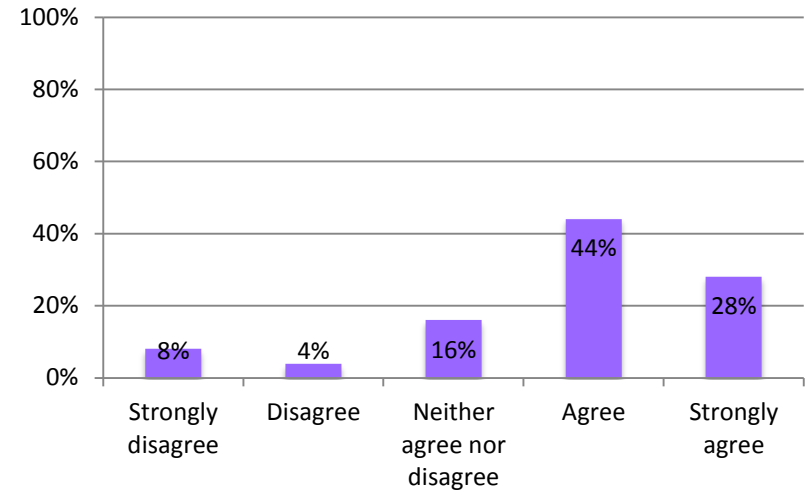

## ***STK11***

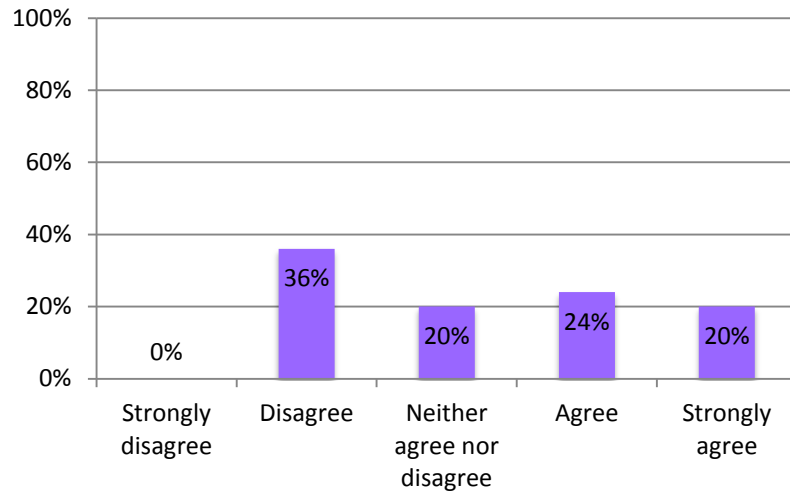

## ***TP53***

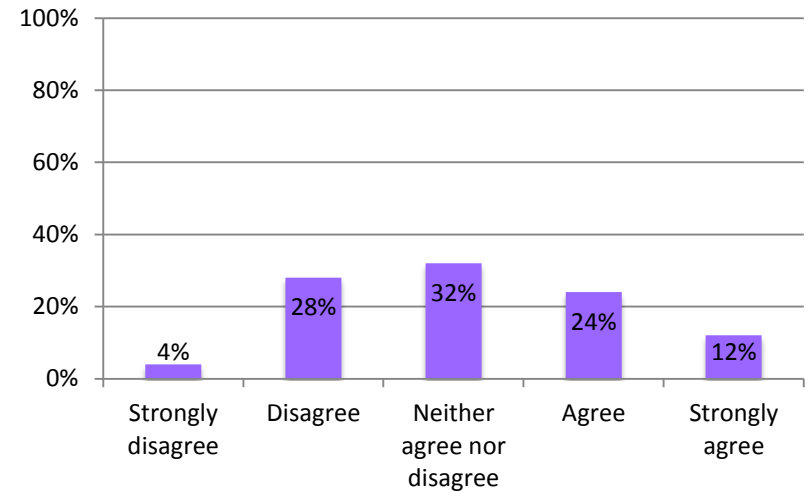

# Bowel cancer / polyposis panel

\* 4. I think the following genes SHOULD be included on a BOWEL CANCER panel:

|        | Strongly disagree        | Disagree                 | Neither agree nor disagree | Agree                    | Strongly agree           |
|--------|--------------------------|--------------------------|----------------------------|--------------------------|--------------------------|
| APC    | <input type="checkbox"/> | <input type="checkbox"/> | <input type="checkbox"/>   | <input type="checkbox"/> | <input type="checkbox"/> |
| BMPR1A | <input type="checkbox"/> | <input type="checkbox"/> | <input type="checkbox"/>   | <input type="checkbox"/> | <input type="checkbox"/> |
| EPCAM  | <input type="checkbox"/> | <input type="checkbox"/> | <input type="checkbox"/>   | <input type="checkbox"/> | <input type="checkbox"/> |
| GREM1  | <input type="checkbox"/> | <input type="checkbox"/> | <input type="checkbox"/>   | <input type="checkbox"/> | <input type="checkbox"/> |
| MLH1   | <input type="checkbox"/> | <input type="checkbox"/> | <input type="checkbox"/>   | <input type="checkbox"/> | <input type="checkbox"/> |
| MSH2   | <input type="checkbox"/> | <input type="checkbox"/> | <input type="checkbox"/>   | <input type="checkbox"/> | <input type="checkbox"/> |
| MSH6   | <input type="checkbox"/> | <input type="checkbox"/> | <input type="checkbox"/>   | <input type="checkbox"/> | <input type="checkbox"/> |
| MUTYH  | <input type="checkbox"/> | <input type="checkbox"/> | <input type="checkbox"/>   | <input type="checkbox"/> | <input type="checkbox"/> |
| NTHL1  | <input type="checkbox"/> | <input type="checkbox"/> | <input type="checkbox"/>   | <input type="checkbox"/> | <input type="checkbox"/> |
| PMS2   | <input type="checkbox"/> | <input type="checkbox"/> | <input type="checkbox"/>   | <input type="checkbox"/> | <input type="checkbox"/> |
| POLE   | <input type="checkbox"/> | <input type="checkbox"/> | <input type="checkbox"/>   | <input type="checkbox"/> | <input type="checkbox"/> |
| POLD1  | <input type="checkbox"/> | <input type="checkbox"/> | <input type="checkbox"/>   | <input type="checkbox"/> | <input type="checkbox"/> |
| PTEN   | <input type="checkbox"/> | <input type="checkbox"/> | <input type="checkbox"/>   | <input type="checkbox"/> | <input type="checkbox"/> |
| SMAD4  | <input type="checkbox"/> | <input type="checkbox"/> | <input type="checkbox"/>   | <input type="checkbox"/> | <input type="checkbox"/> |
| STK11  | <input type="checkbox"/> | <input type="checkbox"/> | <input type="checkbox"/>   | <input type="checkbox"/> | <input type="checkbox"/> |

# Bowel cancer/polyposis: Majority agreement

**APC**

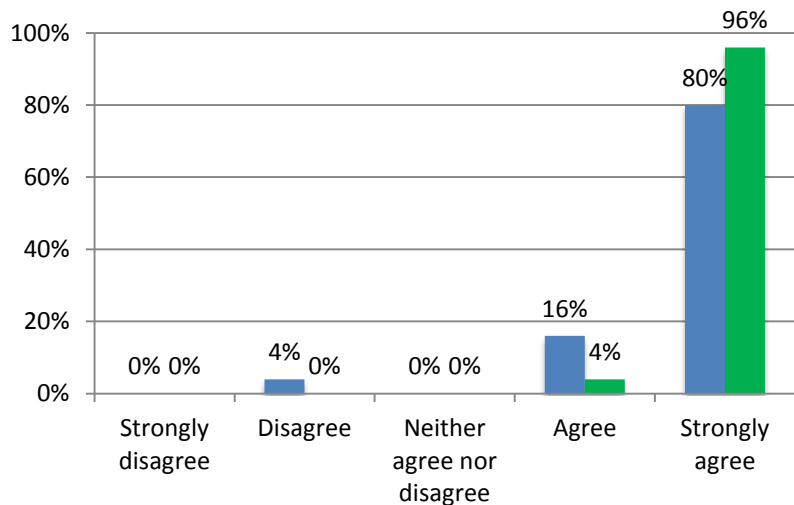

**MUTYH**

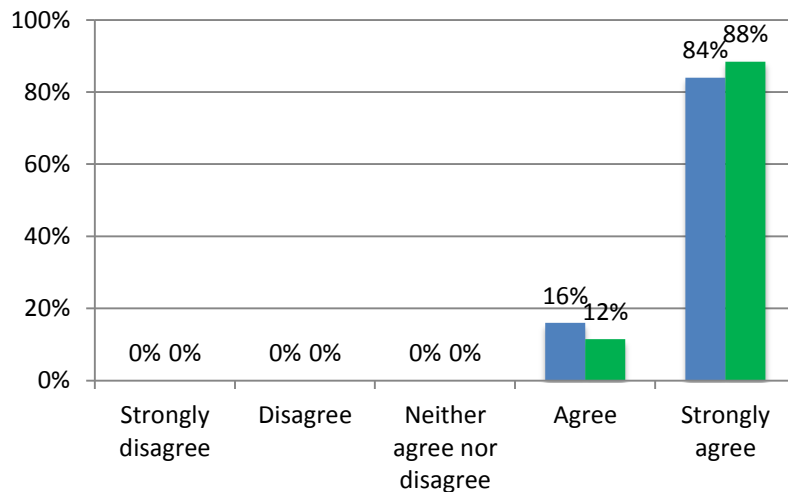

**SMAD4**

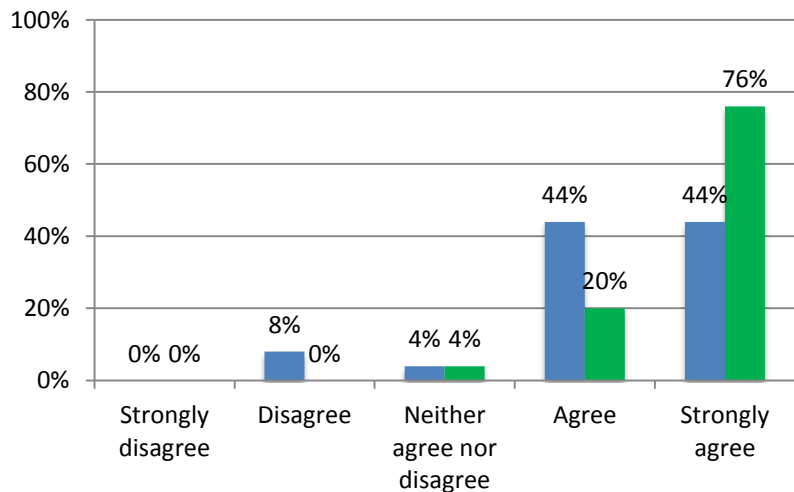

**BMPR1A**

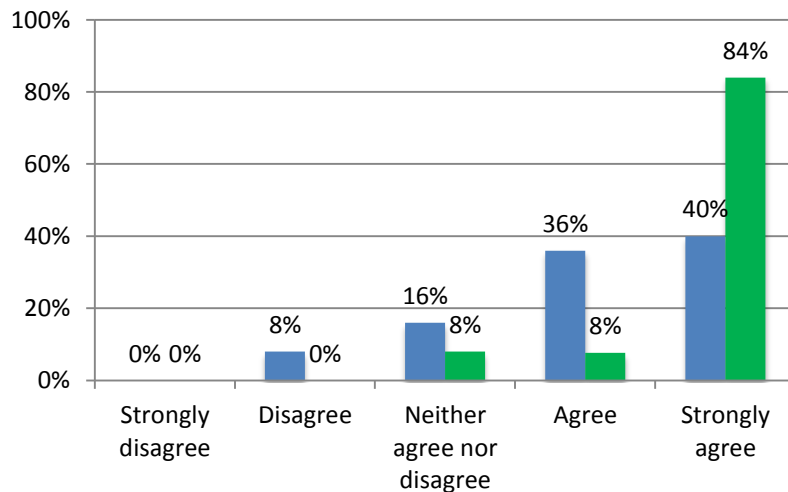

# Bowel cancer/polyposis: Majority agreement

## *MLH1, MSH2 & MSH6*

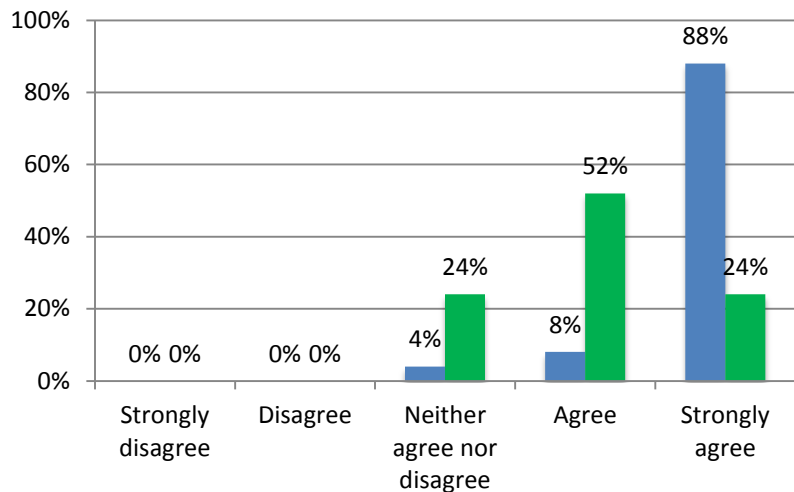

## *PMS2*

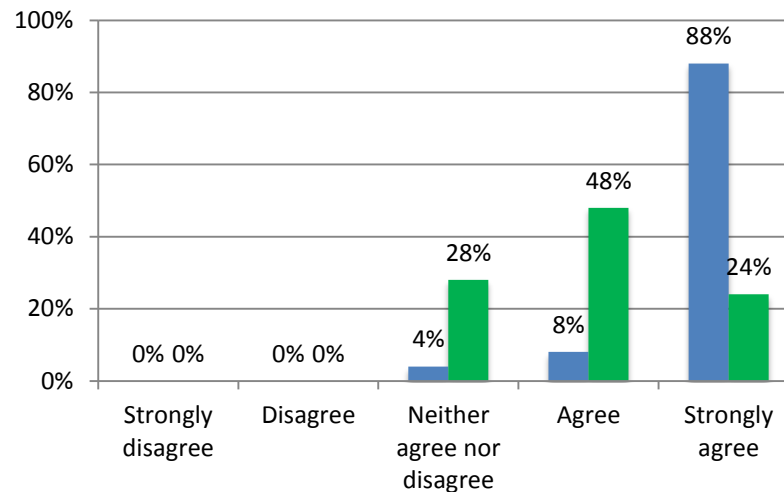

## *EPCAM (del exons 8-9)*

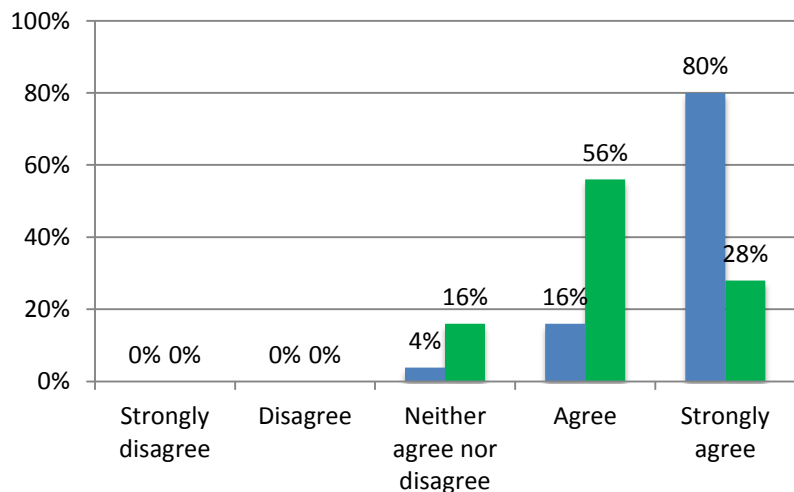

# Bowel cancer/polyposis: Majority agreement

## *POLE*

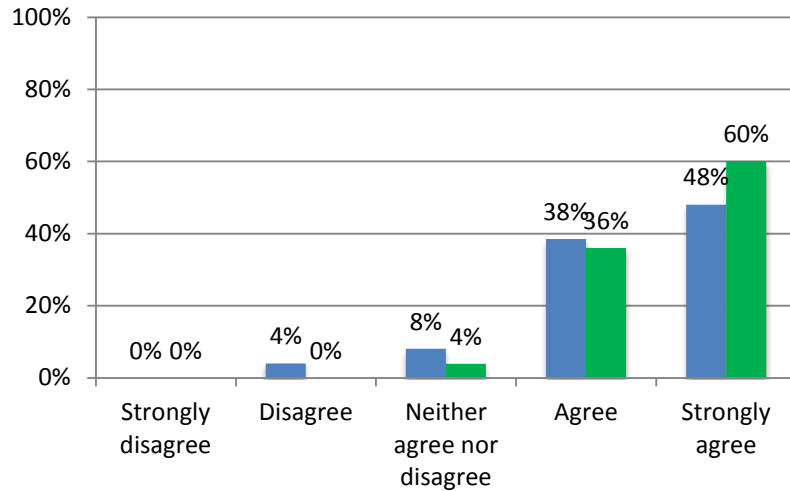

## *POLD1*

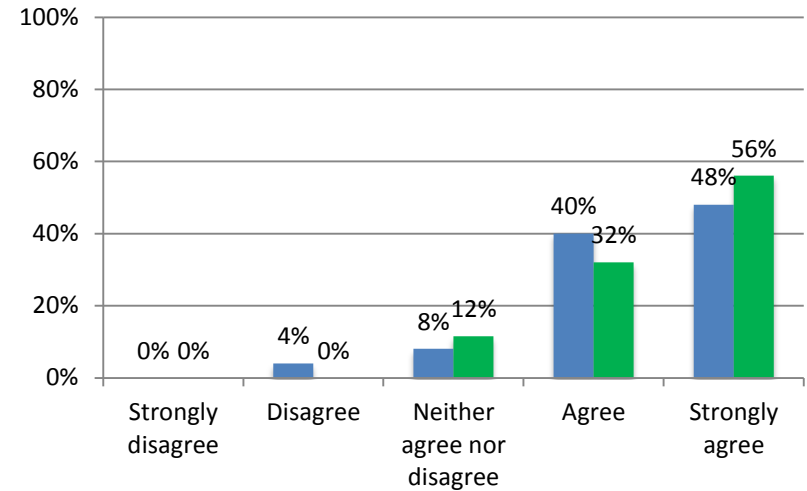

## *SMAD4*

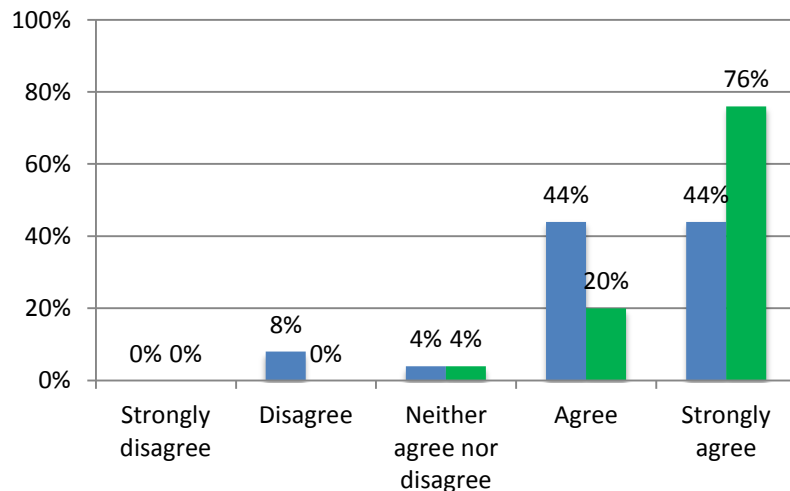

## *STK11*

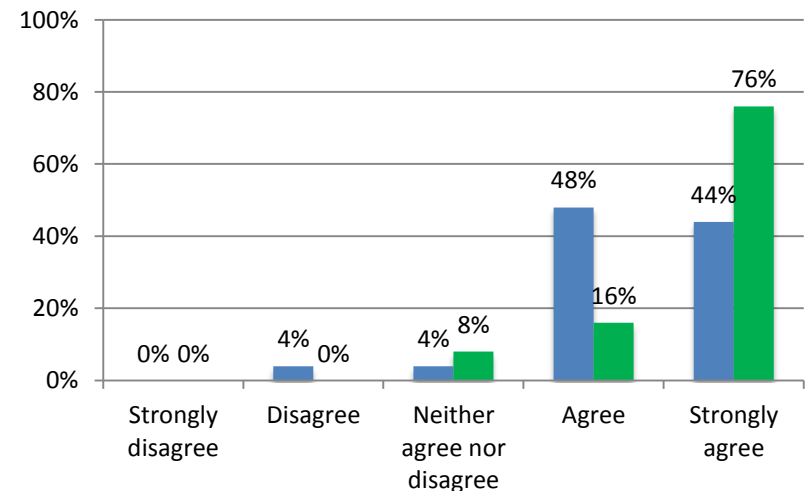

# Bowel cancer/polyposis: TBD

***GREM1* (upstream dup)**

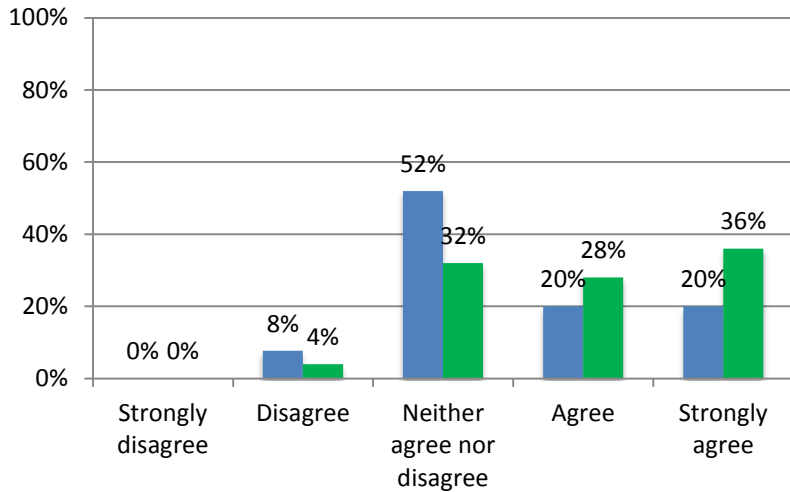

***NTHL1***

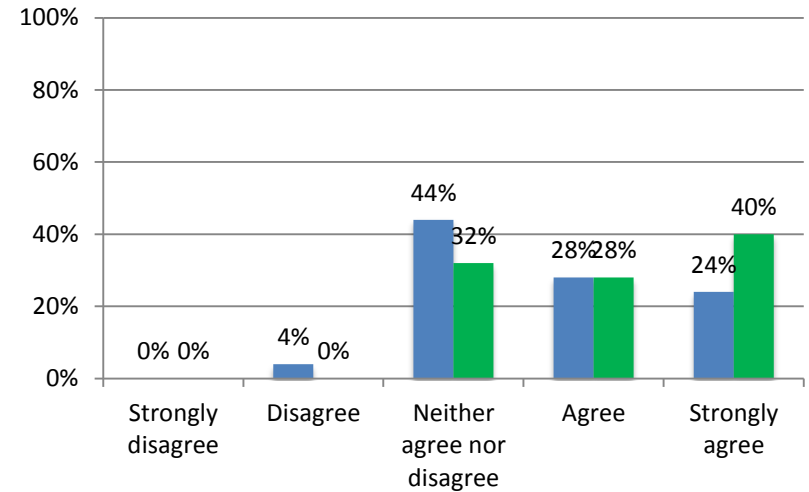

Supplement: jmedgenet-2017-105188supp001.pdf [file jmedgenet-2017-105188supp001.pdf]
