# Supplementary material for: Consensus for genes to be included on cancer panel tests offered by UK genetics services: guidelines of the UK Cancer Genetics Group
Source: PubMed Central journal article supplement — J Med Genet. 2018 Apr 16;55(6):1–6. doi: 10.1136/jmedgenet-2017-105188 (PMC5992364; doi:10.1136/jmedgenet-2017-105188), 2018-04-16
Supplement: jmedgenet-2017-105188supp003.pdf [file jmedgenet-2017-105188supp003.pdf]

**CGG-UKGTN Cancer Panels Workshop – 8<sup>th</sup> May 2017 – Participants**

| <b>Name</b>              | <b>Role</b>                       | <b>Institution</b>             |
|--------------------------|-----------------------------------|--------------------------------|
| Dr Kai Ren Ong           | Cancer Genetics Lead              | West Midlands Genetics Service |
| Dr Alan Donaldson        | Cancer Genetics Lead              | Bristol Genetics Service       |
| Dr Marc Tischkowitz      | Cancer Genetics Lead              | East Anglian Genetics Service  |
| Dr Carole Brewer         | Cancer Genetics Lead              | Peninsula Genetics Service     |
| Dr Julian Adlard         | Cancer Genetics Lead              | Yorkshire Genetics Service     |
| Dr Julian Barwell        | Cancer Genetics Lead              | Leicester Genetics Service     |
| Dr Lynn Greenhalgh       | Cancer Genetics Lead              | Liverpool Genetics Service     |
| Dr Fiona Laloo           | Cancer Genetics Lead              | Manchester Genetics Service    |
| Dr Rachel Harrison       | Cancer Genetics Lead              | Nottingham Genetics Service    |
| Dr Dorothy Halliday      | Cancer Genetics Lead              | Oxford Genetics Service        |
| Dr Zoe Kemp              | On behalf of Cancer Genetics Lead | Royal Marsden Genetics Service |
| Prof Zofia Miedzybrodzka | Cancer Genetics Lead              | Aberdeen Genetics Service      |
| Dr Mary Porteous         | Cancer Genetics Lead              | Edinburgh Genetics Service     |
| Dr Rosemarie Davidson    | Cancer Genetics Lead              | Glasgow Genetics Service       |
| Dr Jackie Cook           | Cancer Genetics Lead              | Sheffield Genetics Service     |
| Dr Diana Eccles          | Cancer Genetics Lead              | Wessex Genetics Service        |
| Dr Munaza Ahmed          | Cancer Genetics Lead              | NE Thames Genetics Service     |
| Dr Angie Brady           | Cancer Genetics Lead              | NW Thames Genetics Service     |
| Dr Anju Kulkarni         | Cancer Genetics Lead              | SE Thames Genetics Service     |
| Dr Katie Snape           | Cancer Genetics Lead              | SW Thames Genetics Service     |
| Dr Alex Murray           | Cancer Genetics Lead              | All Wales Genetics Service     |
| Dr Rachel Robinson       | Clinical Scientist                | Yorkshire Genetics Service     |
| Dr James Drummond        | Clinical Scientist                | East Anglian Genetics Service  |
| Dr Yvonne Wallis         | Clinical Scientist                | West Midlands Genetics Service |
| Dr Amy Taylor            | Genetic Counsellor                | East Anglian Genetics Service  |
| Dr Gill Crawford         | Genetic Counsellor                | Wessex Genetics Service        |
| Sarah Gibson             | Genetic Counsellor                | Glasgow Genetics Service       |
| Oonagh Claber            | Genetic Counsellor                | Northern Genetics Service      |
| Jacquie Westwood         | UKGTN Director                    | UKGTN                          |
| Jane Deller              | UKGTN Programme Manager           | UKGTN                          |
| Dr Chris Patch           | UKGTN Representative              | UKGTN                          |
| Dr Fiona MacDonald       | UKGTN Scientific Advisor          | UKGTN                          |
| Dr Sandi Deans           | UKGTN Representative              | UKGTN                          |
| Dr Mark Kroese           | UKGTN Public Health Advisor       | UKGTN                          |
| Dr Ian Frayling          | UK-CGG Steering Committee         | UK-CGG                         |
| Dr Lucy Side             | UK-CGG Steering Committee Chair   | UK-CGG                         |
| Dr Louise Izatt          | UK-CGG Steering Committee         | UK-CGG                         |
| Dr Helen Hanson          | UK-CGG Steering Committee         | UK-CGG                         |
| Prof Nazneen Rahman      | Research & Mainstreaming          | Institute of Cancer Research   |
| Prof Clare Turnbull      | Research & Mainstreaming          | Genomics England               |
| Dr Joyce Solomons        | Cancer Leads Survey Coordinator   | Oxford Genetics Service        |
